# Supplementary material for: The impact of rifaximin-α on the hospital resource use associated with the management of patients with hepatic encephalopathy: a retrospective observational study (IMPRESS)
Source: PubMed Central journal article supplement — Frontline Gastroenterol. 2017 Apr 7;8(4):243–51. doi: 10.1136/flgastro-2016-100792 (PMC5641856; doi:10.1136/flgastro-2016-100792), 2017-04-07

## SUPPLEMENTARY APPENDIX

**Supplementary Table 1: Liver-related primary ICD-10 diagnosis codes**

Hospitalisations with the primary ICD-10 diagnosis codes listed below were classified as liver-related.

| <b>Primary ICD-10 code</b> | <b>Description</b>                                |
|----------------------------|---------------------------------------------------|
| K70                        | Alcoholic liver disease                           |
| K70.0                      | Alcoholic fatty liver                             |
| K70.1                      | Alcoholic hepatitis                               |
| K70.2                      | Alcoholic fibrosis and sclerosis of liver         |
| K70.3                      | Alcoholic cirrhosis of liver                      |
| K70.4                      | Alcoholic hepatic failure                         |
| K70.9                      | Alcoholic liver disease, unspecified              |
| K71.8                      | Toxic liver disease with other disorders of liver |
| K72                        | Hepatic failure, not elsewhere classified         |
| K72.0                      | Acute and subacute hepatic failure                |
| K72.1                      | Chronic hepatic failure                           |
| K72.9                      | Hepatic failure, unspecified                      |
| K74.6                      | Other and unspecified cirrhosis of liver          |
| K75.8                      | Other specified inflammatory liver diseases       |
| K76.0                      | Fatty (change of) liver, not elsewhere classified |
| K76.5                      | Hepatic veno-occlusive disease                    |
| K76.6                      | Portal hypertension                               |
| K76.7                      | Hepato-renal syndrome                             |
| K76.9                      | Liver disease, unspecified                        |
| C22.0                      | Malignant neoplasm: Liver cell carcinoma          |
| I85                        | Oesophageal varices                               |
| I85.0                      | Oesophageal varices with bleeding                 |
| I85.9                      | Oesophageal varices without bleeding              |
| I86.4                      | Gastric varices                                   |

### Supplementary Table 2: Additional (potentially liver-related) primary ICD-10 diagnosis codes

For hospitalisations with the primary ICD-10 diagnosis codes listed below, anonymised records were reviewed on a case-by-case basis by a medical representative of the study sponsor to determine whether the admission was liver-related.

| Primary ICD-10 code | Description                                                                |
|---------------------|----------------------------------------------------------------------------|
| R18                 | Ascites                                                                    |
| R41.0               | Disorientation, unspecified                                                |
| R41                 | Other symptoms and signs involving cognitive functions and awareness       |
| F10.0               | Mental and behavioural disorders due to use of alcohol: Acute intoxication |
| G93.4               | Encephalopathy, unspecified                                                |
| F10.3               | Mental and behavioural disorders due to use of alcohol: Withdrawal state   |
| F05.9               | Delirium, unspecified                                                      |
| I98.2               | Oesophageal varices without bleeding in diseases classified elsewhere      |
| I98.3               | Oesophageal varices with bleeding in diseases classified elsewhere         |

### Supplementary Table 3: All-cause resource use in surviving patients prescribed rifaximin- $\alpha$ 1100mg/day (UK licensed dose)

| Resource use parameter*       | 6 months (N=114) |                                 |                                  |                | 12 months (N=102) |                                 |                                  |                |
|-------------------------------|------------------|---------------------------------|----------------------------------|----------------|-------------------|---------------------------------|----------------------------------|----------------|
|                               | n <sup>#</sup>   | Pre-RFX initiation <sup>†</sup> | Post-RFX initiation <sup>†</sup> | P <sup>‡</sup> | n <sup>#</sup>    | Pre-RFX initiation <sup>†</sup> | Post-RFX initiation <sup>†</sup> | P <sup>‡</sup> |
| <b>ALL-CAUSE RESOURCE USE</b> |                  |                                 |                                  |                |                   |                                 |                                  |                |
| Hospitalisations per patient  | 31               | 1.9<br>(0.4)                    | 0.6<br>(0.1)                     | <0.001         | 30                | 2.7<br>(0.6)                    | 1.5<br>(0.3)                     | 0.071          |
| Hospital bed days per patient | 31               | 21.5<br>(4.0)                   | 5.0<br>(1.6)                     | <0.001         | 30                | 28.9<br>(5.2)                   | 14.1<br>(3.9)                    | 0.013          |

**Definitions:** 'Hospitalisation' includes overnight stay admissions only (i.e. excluding day case); it includes both non-elective (unplanned) admissions (via ED or GP direct referral route) and elective (planned) admissions.

**Abbreviations:** ED, emergency department; GP, general practitioner; RFX, rifaximin- $\alpha$ .

\* Data are presented for all surviving patients at the end of 6 months (N=114) or 12 months (N=102)

<sup>#</sup> Number of patients with  $\geq 1$  admission/attendance in the observed periods (pre-RFX, post-RFX or both)

<sup>†</sup> Shown as the mean (standard error of the mean [SEM]) per patient

<sup>‡</sup> Paired t-test

**Supplementary Table 4: Resource use in surviving patients with at least one admission / attendance in the observed periods (pre-rifaximin- $\alpha$ , post-rifaximin- $\alpha$  or both)**

| Resource use parameter*                   | 6 months       |                                 |                                  |                | 12 months      |                                 |                                  |                |
|-------------------------------------------|----------------|---------------------------------|----------------------------------|----------------|----------------|---------------------------------|----------------------------------|----------------|
|                                           | N <sup>#</sup> | Pre-RFX initiation <sup>†</sup> | Post-RFX initiation <sup>†</sup> | P <sup>‡</sup> | N <sup>#</sup> | Pre-RFX initiation <sup>†</sup> | Post-RFX initiation <sup>†</sup> | P <sup>‡</sup> |
| <b>LIVER-RELATED RESOURCE USE</b>         |                |                                 |                                  |                |                |                                 |                                  |                |
| Hospitalisations per patient              | 89             | 1.6<br>(0.1)                    | 0.6<br>(0.1)                     | <0.001         | 85             | 2.0<br>(0.2)                    | 1.0<br>(0.2)                     | <0.001         |
| Hospital bed days per patient             | 89             | 22.9<br>(3.1)                   | 8.6<br>(1.9)                     | <0.001         | 85             | 25.1<br>(3.2)                   | 10.7<br>(2.2)                    | <0.001         |
| Hospital bed days per admission           | 89             | 14.0<br>(1.7)                   | 6.1<br>(1.4)                     | 0.001          | 85             | 13.1<br>(1.6)                   | 6.3<br>(1.4)                     | 0.002          |
| Critical care admissions per patient      | 16             | 1.1<br>(0.1)                    | 0.4<br>(0.2)                     | 0.022          | 15             | 1.1<br>(0.1)                    | 0.3<br>(0.2)                     | 0.005          |
| Critical care bed days per patient        | 16             | 7.6<br>(2.6)                    | 2.4<br>(1.4)                     | 0.111          | 15             | 9.7<br>(2.9)                    | 2.3<br>(1.5)                     | 0.056          |
| Non-elective admissions per patient       | 74             | 1.6<br>(0.2)                    | 0.6<br>(0.1)                     | <0.001         | 71             | 1.9<br>(0.2)                    | 0.9<br>(0.2)                     | 0.006          |
| 30-day emergency readmissions per patient | 37             | 1.4<br>(0.2)                    | 0.7<br>(0.2)                     | 0.037          | 34             | 1.7<br>(0.4)                    | 0.9<br>(0.2)                     | 0.084          |
| <b>All-CAUSE RESOURCE USE</b>             |                |                                 |                                  |                |                |                                 |                                  |                |
| Hospitalisations per patient              | 101            | 2.2<br>(0.2)                    | 1.0<br>(0.1)                     | <0.001         | 99             | 2.7<br>(0.3)                    | 1.7<br>(0.2)                     | 0.002          |
| Hospital bed days per patient             | 101            | 28.6<br>(3.1)                   | 11.9<br>(2.3)                    | <0.001         | 99             | 31.7<br>(3.6)                   | 16.4<br>(2.9)                    | <0.001         |
| Hospital bed days per admission           | 101            | 14.2<br>(1.5)                   | 7.2<br>(1.3)                     | 0.001          | 99             | 13.0<br>(1.5)                   | 6.0<br>(0.9)                     | <0.001         |
| Critical care admissions per patient      | 19             | 1.1<br>(0.1)                    | 0.3<br>(0.1)                     | 0.005          | 18             | 1.2<br>(0.1)                    | 0.3<br>(0.2)                     | 0.001          |
| Critical care bed days per patient        | 19             | 7.9<br>(2.3)                    | 2.0<br>(1.2)                     | 0.046          | 18             | 11.3<br>(2.8)                   | 2.4<br>(1.4)                     | 0.017          |
| Non-elective admissions per patient       | 88             | 2.1<br>(0.2)                    | 1.0<br>(0.1)                     | <0.001         | 87             | 2.5<br>(0.3)                    | 1.6<br>(0.2)                     | <0.001         |
| 30-day emergency readmissions per patient | 50             | 1.7<br>(0.3)                    | 0.9<br>(0.2)                     | 0.023          | 52             | 1.8<br>(0.4)                    | 1.2<br>(0.2)                     | 0.162          |
| ED attendances per patient <sup>‡</sup>   | 61             | 1.9<br>(0.3)                    | 1.0<br>(0.2)                     | <0.001         | 62             | 2.4<br>(0.4)                    | 1.8<br>(0.3)                     | 0.149          |

**Definitions:** 'Hospitalisation' includes overnight stay admissions only (i.e. excluding day case); it includes both non-elective (unplanned) admissions (via ED or GP direct referral route) and elective (planned) admissions. 'ED attendance' includes only attendances which did NOT result in hospital admission.

**Abbreviations:** ED, emergency department; GP, general practitioner; RFX, rifaximin- $\alpha$ .

\* Data are presented for surviving patients with  $\geq 1$  admission/attendance in the pre-RFX, post-RFX or both periods

<sup>#</sup> Number of surviving patients with  $\geq 1$  admission/attendance in the observed periods (pre-RFX, post-RFX or both)

<sup>†</sup> Shown as the mean (standard error of the mean [SEM]) per patient

<sup>‡</sup> Paired t-test

<sup>‡</sup> Data only available for all-cause (not liver-related)

## SUPPLEMENTARY FIGURE LEGENDS

### Supplementary Figure 1: Critical care admissions and bed days in surviving patients

#### Panel A: Liver-related

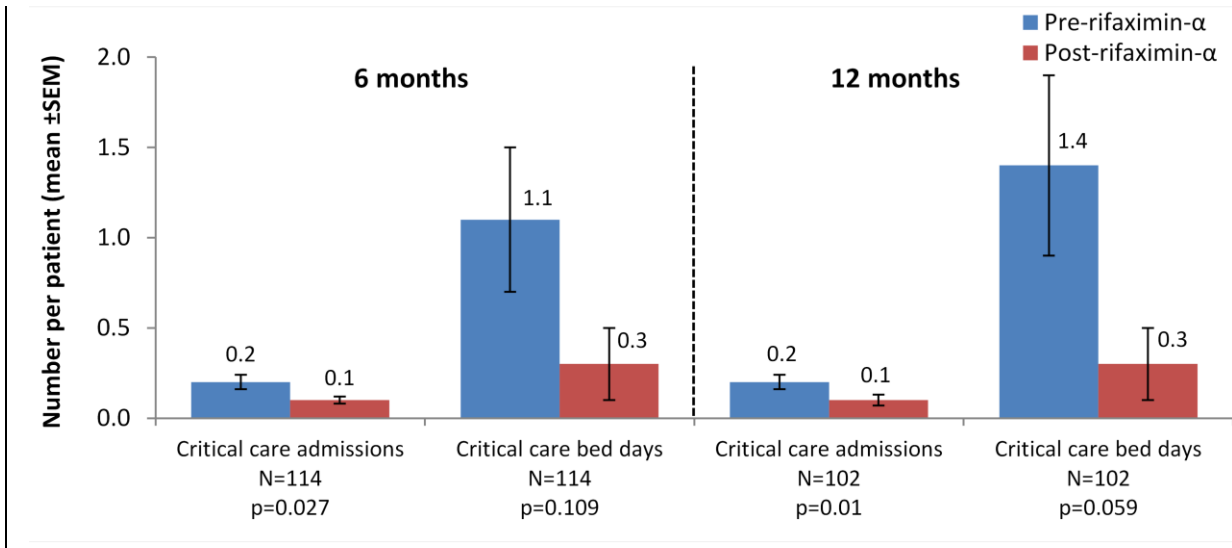

#### Panel B: All-cause

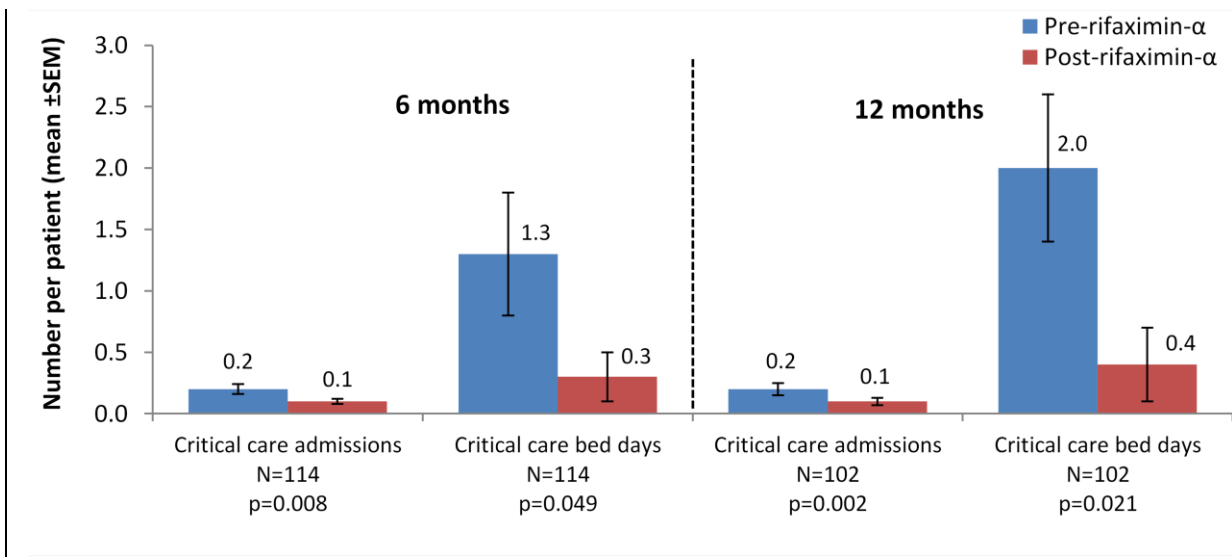

Supplement: flgastro-2016-100792supp001.pdf [file flgastro-2016-100792supp001.pdf]
